# Supplementary material for: Selection on mutators is not frequency-dependent
Source: eLife. 2019 Nov 7;8:e51177. doi: 10.7554/eLife.51177 (PMC6867826; doi:10.7554/eLife.51177)
Supplement: Figure 1—figure supplement 1—source data 1. — Data set includes mutator frequencies in randomly-chosen individual realizationss and mutator frequencies averaged across all realizations. [file elife-51177-fig1-figsupp1-data1.csv]

A
1.00E-05	9.00E-06	8.00E-06	1.00E-05	8.00E-06	3.00E-06	6.00E-06	7.00E-06	1.50E-05	1.30E-05	1.60E-05	1.40E-05	8.00E-06	6.00E-06	6.00E-06	2.00E-06	4.00E-06	5.00E-06	6.00E-06	7.00E-06	6.00E-06	6.00E-06	4.00E-06	3.00E-06	1.00E-06	1.00E-06	1.00E-06	0	0	0	0	0	0	0	0	0	0	0	0	0	0	0	0	0	0	0	0	0	0	0
3.00E-05	2.90E-05	3.90E-05	4.80E-05	4.30E-05	4.00E-05	3.70E-05	3.70E-05	3.70E-05	3.40E-05	5.00E-05	5.60E-05	6.30E-05	7.20E-05	8.00E-05	6.80E-05	6.60E-05	8.00E-05	5.30E-05	5.60E-05	5.90E-05	6.30E-05	5.90E-05	6.80E-05	8.00E-05	9.10E-05	0.000102	0.0001	0.000115	0.000127	0.000123	0.000101	9.30E-05	8.60E-05	6.00E-05	5.70E-05	4.40E-05	3.60E-05	3.20E-05	2.40E-05	2.20E-05	1.80E-05	2.20E-05	2.00E-05	1.50E-05	1.70E-05	1.50E-05	1.20E-05	1.50E-05	1.00E-05
0.0001	8.50E-05	9.90E-05	0.000103	9.80E-05	0.000106	0.000108	9.80E-05	0.000111	0.000114	0.000113	0.000118	0.000122	0.00014	0.000129	0.00013	0.000129	0.000142	0.00015	0.000145	0.000156	0.000157	0.000162	0.000152	0.000176	0.000183	0.000172	0.000188	0.000197	0.000188	0.00016	0.000108	8.20E-05	7.60E-05	5.40E-05	4.50E-05	4.20E-05	3.30E-05	1.30E-05	7.00E-06	6.00E-06	7.00E-06	3.00E-06	5.00E-06	2.00E-06	2.00E-06	0	0	0	0
0.0003	0.000318	0.000285	0.000295	0.000303	0.000284	0.000285	0.000326	0.000339	0.000374	0.000405	0.00042	0.000429	0.000457	0.000458	0.000492	0.000532	0.000554	0.000574	0.0006	0.0006	0.000705	0.000786	0.000909	0.001067	0.00123	0.001468	0.001733	0.002081	0.002447	0.002732	0.003205	0.003498	0.003725	0.003994	0.004152	0.004225	0.004311	0.004337	0.004404	0.004398	0.0043	0.004317	0.004416	0.004539	0.00456	0.004718	0.004862	0.005179	0.00559
0.001	0.001036	0.001054	0.001064	0.001096	0.001119	0.001067	0.001162	0.001229	0.001224	0.001247	0.001338	0.001381	0.001531	0.001744	0.002015	0.002491	0.003217	0.004228	0.005816	0.008372	0.012155	0.017758	0.026068	0.037941	0.054321	0.074309	0.095939	0.116618	0.134571	0.149	0.159826	0.169123	0.17604	0.183473	0.192442	0.204663	0.219195	0.239325	0.264647	0.296235	0.336204	0.384609	0.440038	0.5019	0.566918	0.632733	0.696035	0.755421	0.80736
B
1.00E-05	9.99E-06	1.00E-05	1.00E-05	1.01E-05	1.01E-05	1.02E-05	1.03E-05	1.05E-05	1.07E-05	1.09E-05	1.13E-05	1.19E-05	1.26E-05	1.38E-05	1.54E-05	1.81E-05	2.22E-05	2.87E-05	3.91E-05	5.52E-05	7.97E-05	0.00011606	0.000168688	0.000242015	0.000338771	0.000458033	0.000596221	0.000749286	0.000913131	0.0010837	0.001256606	0.001427548	0.001593362	0.001753189	0.001908076	0.002060641	0.002213282	0.00236915	0.002530733	0.002700583	0.002881017	0.003073238	0.00327886	0.003498806	0.003734147	0.003986098	0.004255861	0.004543963	0.004852274
3.00E-05	3.00E-05	3.00E-05	3.01E-05	3.02E-05	3.04E-05	3.06E-05	3.09E-05	3.13E-05	3.19E-05	3.27E-05	3.38E-05	3.54E-05	3.76E-05	4.08E-05	4.57E-05	5.31E-05	6.47E-05	8.29E-05	0.000111447	0.000155373	0.000220999	0.000316261	0.000450292	0.000633081	0.000872758	0.001173654	0.001534897	0.001948728	0.002401247	0.002874874	0.00335341	0.003823454	0.004278635	0.004717394	0.005142482	0.005559396	0.005975688	0.006399567	0.006838813	0.007300846	0.007791945	0.008317917	0.008883166	0.009492874	0.010150771	0.010861061	0.011626798	0.012451384	0.013337536
0.0001	9.99E-05	0.00010005	0.000100254	0.000100588	0.000101101	0.000101928	0.000103003	0.00010449	0.000106529	0.000109294	0.000113187	0.000118831	0.000127029	0.000139448	0.000158882	0.000189921	0.000240286	0.000321303	0.000448784	0.000642555	0.000927423	0.001333212	0.001892334	0.002633116	0.003574385	0.004719027	0.006051261	0.007536178	0.009127266	0.010772647	0.012425453	0.014049088	0.015619327	0.017128619	0.018585623	0.020009382	0.021425775	0.022861788	0.02434542	0.025900118	0.027547102	0.029307214	0.031196294	0.033228204	0.035415309	0.037767195	0.040291364	0.04299346	0.045878728
0.0003	0.000300096	0.000300442	0.000301032	0.00030216	0.000303762	0.000306087	0.000309258	0.000313723	0.000319751	0.000328082	0.000339563	0.000356071	0.000380129	0.000416314	0.000472039	0.000559615	0.000697831	0.000916003	0.001257763	0.001782576	0.002563137	0.003681658	0.005226285	0.007282745	0.009915933	0.013146951	0.016939395	0.021196715	0.025777434	0.030522656	0.035283457	0.039940912	0.044424904	0.048713687	0.052829793	0.056827624	0.060779442	0.064764363	0.068859497	0.073129854	0.077633983	0.082419574	0.087525279	0.092983764	0.098818329	0.105045475	0.111676251	0.11871324	0.12615737
0.001	0.001000158	0.00100113	0.001003098	0.001006731	0.001012002	0.001019826	0.001030898	0.00104588	0.001066052	0.001093441	0.001132052	0.001187105	0.001267494	0.001387898	0.001573884	0.001865724	0.00232694	0.003057403	0.004199745	0.005945919	0.008536917	0.012252195	0.017377002	0.024157515	0.032741789	0.043127991	0.055123006	0.068345536	0.082283915	0.096390201	0.110179279	0.123310417	0.135624753	0.147129961	0.157967893	0.168346756	0.178505044	0.188668643	0.199042199	0.209786515	0.221033004	0.232874786	0.24537898	0.258585675	0.272515694	0.287165468	0.302512466	0.318522207	0.335138205
[truncated: 950 more columns]
