# Supplementary material for: Selection on mutators is not frequency-dependent
Source: eLife. 2019 Nov 7;8:e51177. doi: 10.7554/eLife.51177 (PMC6867826; doi:10.7554/eLife.51177)
Supplement: Figure 3—source data 1. — Data set includes frequencies of a beneficial mutation and a frequncy-dependent mutation in randomly-chosen individual realizations and averaged across all replicate realizations. [file elife-51177-fig3-data1.csv]

Figure 3A
1.00E-07	3.00E-07	3.00E-07	5.00E-07	1.00E-07	1.00E-07	1.00E-07	0	0	0	0	0	0	0	0	0	0	0	0	0	0	0	0	0	0	0	0	0	0	0	0	0	0	0	0	0	0	0	0	0	0	0	0	0	0	0	0	0	0	0
1.00E-06	1.10E-06	1.00E-06	1.20E-06	1.30E-06	9.00E-07	1.20E-06	1.50E-06	1.10E-06	4.00E-07	2.00E-07	0	0	0	0	0	0	0	0	0	0	0	0	0	0	0	0	0	0	0	0	0	0	0	0	0	0	0	0	0	0	0	0	0	0	0	0	0	0	0
1.00E-05	9.60E-06	1.08E-05	1.08E-05	1.01E-05	1.10E-05	9.90E-06	1.13E-05	1.10E-05	1.19E-05	1.30E-05	1.31E-05	1.30E-05	1.30E-05	1.55E-05	1.86E-05	2.00E-05	2.10E-05	1.96E-05	1.86E-05	2.02E-05	1.94E-05	2.19E-05	2.36E-05	2.43E-05	2.36E-05	2.51E-05	2.56E-05	2.66E-05	2.66E-05	3.00E-05	3.06E-05	2.96E-05	2.90E-05	2.80E-05	2.71E-05	2.99E-05	2.78E-05	2.70E-05	2.57E-05	2.71E-05	2.58E-05	2.72E-05	2.79E-05	2.99E-05	3.14E-05	3.18E-05	2.87E-05	3.16E-05	3.43E-05
0.0001	0.0001	9.73E-05	9.76E-05	9.97E-05	0.0001	9.37E-05	9.36E-05	9.10E-05	9.38E-05	9.07E-05	9.08E-05	8.96E-05	9.11E-05	8.96E-05	8.75E-05	8.87E-05	8.73E-05	8.51E-05	8.36E-05	8.87E-05	9.17E-05	9.70E-05	0.0001043	0.0001029	0.000103	0.0001015	0.0001017	9.27E-05	9.23E-05	9.20E-05	8.77E-05	8.89E-05	9.19E-05	9.65E-05	0.0001005	9.58E-05	0.0001033	0.0001031	0.000108	0.00011	0.0001129	0.0001186	0.0001146	0.0001144	0.0001124	0.0001157	0.0001193	0.0001167	0.0001179
0.001	0.00103	0.0010432	0.0010495	0.0010662	0.0010819	0.0010916	0.0011014	0.001121	0.0011288	0.0011454	0.0011689	0.0011778	0.0011854	0.0011863	0.0011992	0.0012097	0.0012022	0.0012403	0.0012502	0.001286	0.0012863	0.0013185	0.0013413	0.0013654	0.0013964	0.0014182	0.0014277	0.00144	0.0014616	0.0014856	0.00152	0.0015309	0.0015558	0.0015615	0.0015952	0.0016158	0.0016297	0.0016511	0.0016828	0.0016899	0.0017504	0.0017525	0.0017923	0.0018135	0.0018165	0.0018222	0.0018483	0.0018588	0.0018874
Figure 3B
1.00E-07	1.01E-07	1.01E-07	1.02E-07	1.03E-07	1.04E-07	1.05E-07	1.07E-07	1.08E-07	1.09E-07	1.10E-07	1.11E-07	1.12E-07	1.13E-07	1.14E-07	1.15E-07	1.15E-07	1.17E-07	1.17E-07	1.18E-07	1.19E-07	1.20E-07	1.21E-07	1.22E-07	1.23E-07	1.24E-07	1.25E-07	1.26E-07	1.27E-07	1.29E-07	1.30E-07	1.32E-07	1.33E-07	1.35E-07	1.36E-07	1.37E-07	1.38E-07	1.40E-07	1.40E-07	1.41E-07	1.43E-07	1.45E-07	1.47E-07	1.48E-07	1.50E-07	1.52E-07	1.54E-07	1.55E-07	1.57E-07	1.59E-07
1.00E-06	1.01E-06	1.02E-06	1.03E-06	1.04E-06	1.05E-06	1.06E-06	1.07E-06	1.08E-06	1.09E-06	1.10E-06	1.11E-06	1.13E-06	1.14E-06	1.15E-06	1.16E-06	1.17E-06	1.19E-06	1.20E-06	1.21E-06	1.22E-06	1.24E-06	1.25E-06	1.26E-06	1.27E-06	1.28E-06	1.30E-06	1.31E-06	1.32E-06	1.34E-06	1.35E-06	1.36E-06	1.37E-06	1.39E-06	1.40E-06	1.42E-06	1.43E-06	1.44E-06	1.46E-06	1.47E-06	1.49E-06	1.50E-06	1.52E-06	1.53E-06	1.55E-06	1.56E-06	1.58E-06	1.60E-06	1.61E-06	1.63E-06
1.00E-05	1.01E-05	1.02E-05	1.03E-05	1.04E-05	1.05E-05	1.06E-05	1.07E-05	1.08E-05	1.09E-05	1.11E-05	1.12E-05	1.13E-05	1.14E-05	1.15E-05	1.16E-05	1.17E-05	1.19E-05	1.20E-05	1.21E-05	1.22E-05	1.23E-05	1.25E-05	1.26E-05	1.27E-05	1.29E-05	1.30E-05	1.31E-05	1.32E-05	1.34E-05	1.35E-05	1.36E-05	1.37E-05	1.39E-05	1.40E-05	1.42E-05	1.43E-05	1.45E-05	1.46E-05	1.47E-05	1.49E-05	1.50E-05	1.52E-05	1.54E-05	1.55E-05	1.57E-05	1.58E-05	1.60E-05	1.61E-05	1.63E-05
0.0001	0.000101009	0.000101986	0.000103005	0.000104045	0.000105095	0.000106138	0.000107194	0.000108259	0.000109364	0.000110458	0.00011157	0.000112693	0.000113833	0.000114973	0.000116107	0.000117268	0.000118424	0.000119627	0.000120839	0.000122051	0.000123271	0.000124499	0.00012576	0.000127036	0.000128312	0.00012959	0.000130903	0.000132197	0.000133527	0.000134856	0.00013619	0.000137539	0.000138921	0.000140326	0.000141712	0.000143143	0.000144586	0.000146044	0.00014753	0.000149002	0.000150479	0.000151974	0.000153498	0.000155034	0.000156594	0.000158135	0.000159702	0.000161323	0.000162927
0.001	0.001009979	0.00102003	0.001030181	0.001040447	0.001050832	0.001061381	0.001071955	0.001082629	0.001093408	0.001104339	0.001115294	0.001126452	0.001137718	0.001149078	0.001160504	0.001172097	0.001183779	0.001195613	0.001207569	0.001219652	0.001231845	0.001244139	0.00125654	0.001269066	0.001281788	0.001294593	0.001307564	0.001320639	0.001333794	0.001347134	0.001360596	0.001374155	0.001387873	0.001401756	0.001415739	0.001429903	0.001444207	0.0014586	0.001473156	0.001487905	0.001502769	0.001517817	0.001533002	0.001548325	0.001563775	0.001579372	0.001595162	0.001611125	0.001627192
Figure 3C
0.001	0.0009717	0.0009539	0.000937	0.0009146	0.0008936	0.0008472	0.0008413	0.0008252	0.0008233	0.0008109	0.0007837	0.0007758	0.0007532	0.0007418	0.0007245	0.0007332	0.000725	0.0007147	0.0006964	0.0006734	0.0006695	0.000662	0.0006472	0.0006243	0.0006081	0.0006012	0.0005945	0.0005728	0.0005594	0.0005525	0.0005538	0.0005427	0.0005385	0.0005287	0.0005228	0.0005132	0.0005001	0.0005036	0.0004948	0.0004793	0.0004676	0.0004468	0.000444	0.0004381	0.000433	0.0004279	0.0004246	0.0004142	0.0004052
0.01	0.0098083	0.0096414	0.009455	0.0092336	0.0090693	0.0088855	0.0087188	0.0085927	0.0083818	0.0082078	0.0080549	0.0079374	0.0078026	0.0076304	0.0074631	0.0072925	0.0071565	0.0070437	0.0069301	0.0068103	0.0066688	0.0066026	0.0064894	0.0063252	0.0061764	0.0060687	0.0059975	0.005924	0.0058159	0.0056917	0.0055817	0.0054741	0.0053845	0.0052995	0.0051867	0.0050864	0.0049637	0.004886	0.0047915	0.0047122	0.0046223	0.0045556	0.0044565	0.0043533	0.0042459	0.0041678	0.0040792	0.0040162	0.0038919
0.1	0.0989475	0.0979772	0.0969653	0.0959995	0.0951814	0.0945563	0.0936689	0.0926773	0.0918879	0.091059	0.0903236	0.0896204	0.0886054	0.0878293	0.0869625	0.0860872	0.0853399	0.0845908	0.0837267	0.0831729	0.0823271	0.0815411	0.0808151	0.0801235	0.0793563	0.0787055	0.0779146	0.0772318	0.0766638	0.0759906	0.0753087	0.0745693	0.0738593	0.0732106	0.0727285	0.0719803	0.0713231	0.0705203	0.0697562	0.0692333	0.0686631	0.0679178	0.0671147	0.0663773	0.0658002	0.0650745	0.0644558	0.0637597	0.0631333
0.3	0.3021469	0.3040647	0.3061599	0.3081454	0.310506	0.3130645	0.3154892	0.3180372	0.320584	0.3234076	0.3261285	0.3287896	0.3316108	0.3344754	0.3375157	0.3406107	0.3436979	0.3469899	0.350244	0.3537848	0.3572242	0.36069	0.3646628	0.3684883	0.3721542	0.3759867	0.3801979	0.3843975	0.3886198	0.3930961	0.3979201	0.4024484	0.407276	0.412157	0.4172737	0.4224682	0.4278869	0.4333091	0.4389279	0.4445957	0.4506008	0.456866	0.4632762	0.4698809	0.4764409	0.4833187	0.4904544	0.4976452	0.5045593
0.5	0.5072161	0.5146237	0.5221265	0.5300767	0.5378894	0.5463365	0.5548451	0.5635957	0.5723683	0.581337	0.5902747	0.5995639	0.6090238	0.6186466	0.6281866	0.637829	0.6477499	0.6576089	0.6674525	0.6774203	0.6873288	0.6973433	0.7074226	0.7173655	0.7274784	0.7376917	0.7476844	0.7576148	0.76735	0.7771011	0.7866285	0.7961413	0.8052217	0.814066	0.8229238	0.8314873	0.839712	0.8477775	0.8557238	0.8634681	0.8708127	0.8778788	0.8846186	0.8913766	0.8976735	0.9037942	0.9096178	0.9151958	0.9203565
Figure 3D
0.001	0.000980131	0.000960668	0.000941623	0.000922894	0.000904555	0.000886521	0.000868883	0.000851638	0.000834732	0.000818162	0.000801888	0.000785931	0.000770278	0.00075492	0.000739903	0.000725176	0.000710751	0.000696582	0.000682744	0.000669242	0.000655901	0.000642843	0.000630054	0.000617515	0.00060524	0.000593204	0.000581421	0.000569865	0.000558571	0.000547494	0.000536607	0.000525933	0.000515465	0.000505216	0.000495176	0.000485309	0.000475682	0.00046623	0.000456926	0.000447841	0.000438951	0.000430199	0.00042162	0.000413241	0.000405008	0.000396955	0.000389043	0.000381331	0.000373801
0.01	0.009811951	0.009627307	0.009446191	0.009268491	0.009093899	0.008922658	0.00875458	0.008589696	0.008427759	0.008268868	0.008112845	0.00795986	0.007809849	0.007662524	0.007518219	0.007376459	0.007237365	0.007100741	0.006966862	0.006835411	0.006706456	0.006579773	0.006455445	0.006333585	0.006214013	0.006096741	0.005981599	0.005868692	0.005757826	0.005648943	0.005542162	0.005437339	0.005334606	0.005233822	0.005134735	0.005037701	0.004942455	0.004849026	0.004757292	0.004667224	0.004579012	0.004492414	0.004407542	0.00432425	0.004242468	0.004162251	0.004083613	0.004006225	0.003930311
0.1	0.09909945	0.098205913	0.097319924	0.096440856	0.095568794	0.094703233	0.093845326	0.092993869	0.092150047	0.09131296	0.09048271	0.089658826	0.088841563	0.088031205	0.087227863	0.086430607	0.085640528	0.084856664	0.084079386	0.083308711	0.082544283	0.081786024	0.081034346	0.080289479	0.07955003	0.078817314	0.078090553	0.07736943	0.076655357	0.07594654	0.075244048	0.074547829	0.073857	0.073172681	0.072493716	0.071820979	0.071153918	0.070492465	0.069836768	0.069186608	0.068542036	0.067903038	0.067269614	0.06664165	0.066019124	0.065402425	0.064790442	0.064184014	0.063583204
0.3	0.30209396	0.304239596	0.306439402	0.308693846	0.311005184	0.313375315	0.315806276	0.318299055	0.320856151	0.323479738	0.326171415	0.328933321	0.331767748	0.334676052	0.337662056	0.340726054	0.343872573	0.347102327	0.3504188	0.353825049	0.357323223	0.360915643	0.364605892	0.368396915	0.372291771	0.376292693	0.380402861	0.38462601	0.388964412	0.393422405	0.398003286	0.402710383	0.407546854	0.41251672	0.417622256	0.42286741	0.428255822	0.433790843	0.43947476	0.445312717	0.45130611	0.457459335	0.463774656	0.470255451	0.47690364	0.483720153	0.490708939	0.497871433	0.505209021
0.5	0.507389668	0.514955023	0.522696345	0.530613244	0.538705848	0.546971695	0.555410008	0.564016159	0.572787495	0.581718613	0.590804684	0.600039621	0.609415546	0.618923853	0.62855432	0.638297273	0.648141183	0.658072561	0.668078307	0.678143036	0.688250501	0.698385258	0.708529849	0.718667079	0.728775986	0.738840068	0.748839273	0.758753989	0.768566298	0.778255324	0.787804438	0.797194828	0.806410369	0.815435643	0.824255613	0.832856093	0.841224335	0.849350435	0.857224723	0.864839109	0.872187526	0.879265858	0.88607036	0.89259893	0.898852281	0.904830112	0.910535723	0.915971899	0.921143132
[truncated: 2,950 more columns]
