# Supplementary material for: Selection on mutators is not frequency-dependent
Source: eLife journal article supplement (doi:10.7554/elife.51177), 2019-11-07
Supplement: figures [file elife-51177-figures-v3.pdf]

---

## Figures and figure supplements

Selection on mutators is not frequency-dependent

**Yevgeniy Raynes and Daniel Weinreich**

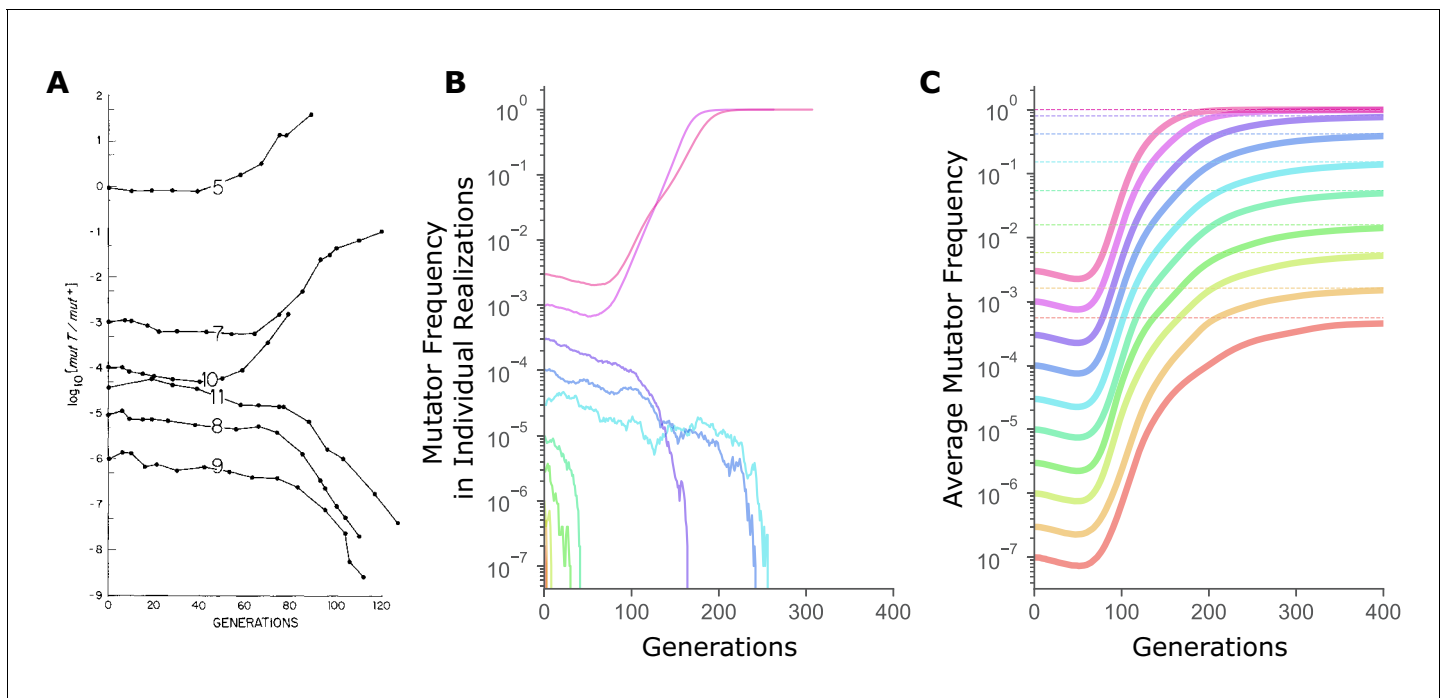

**Figure 1.** The sharp transition between fixation and loss in mutator dynamics at different starting frequencies is due to limited sampling. (A) Changes in the ratio of the mutator and the wild-type alleles of the *E. coli mutT* locus over time in continuous chemostat cultures. (Figure 1 from **Chao and Cox, 1983**). (B) In simulations, mutator trajectories in individual realizations initiated at different starting frequencies recapitulate the experimental observation of the frequency-threshold for mutator hitchhiking. Parameter values used are typical of microbial experimental populations (**Raynes et al., 2018**):  $N = 10^7$ ,  $U_{del} = 10^{-4}$ ,  $U_{ben} = 10^{-6}$ , constant  $s_{ben} = 0.1$ , constant  $s_{del} = -0.1$ . Mutators mutate 100× faster than non-mutators. (C) Average mutator trajectories across realizations do not show evidence of the frequency-threshold. On average, mutators increase in frequency at all  $x_0$ , showing that selection favors mutators independent of frequency. Average mutator frequency always eventually reaches the expected  $P_{fix}(x_0)$  (dashed horizontal lines) calculated in **Figure 2**. Mutator frequencies averaged across  $10^6$  simulation runs at  $x_0 = 10^{-7}$  and  $x_0 = 3 \times 10^{-7}$ , and across  $10^5$  simulation runs for all other starting frequencies. For simulations with exponentially distributed selection coefficients see **Figure 1—figure supplement 1**. © 1983 John Wiley and Sons. All Rights Reserved. **Figure 1** reproduced from **Chao and Cox, 1983** with permission.

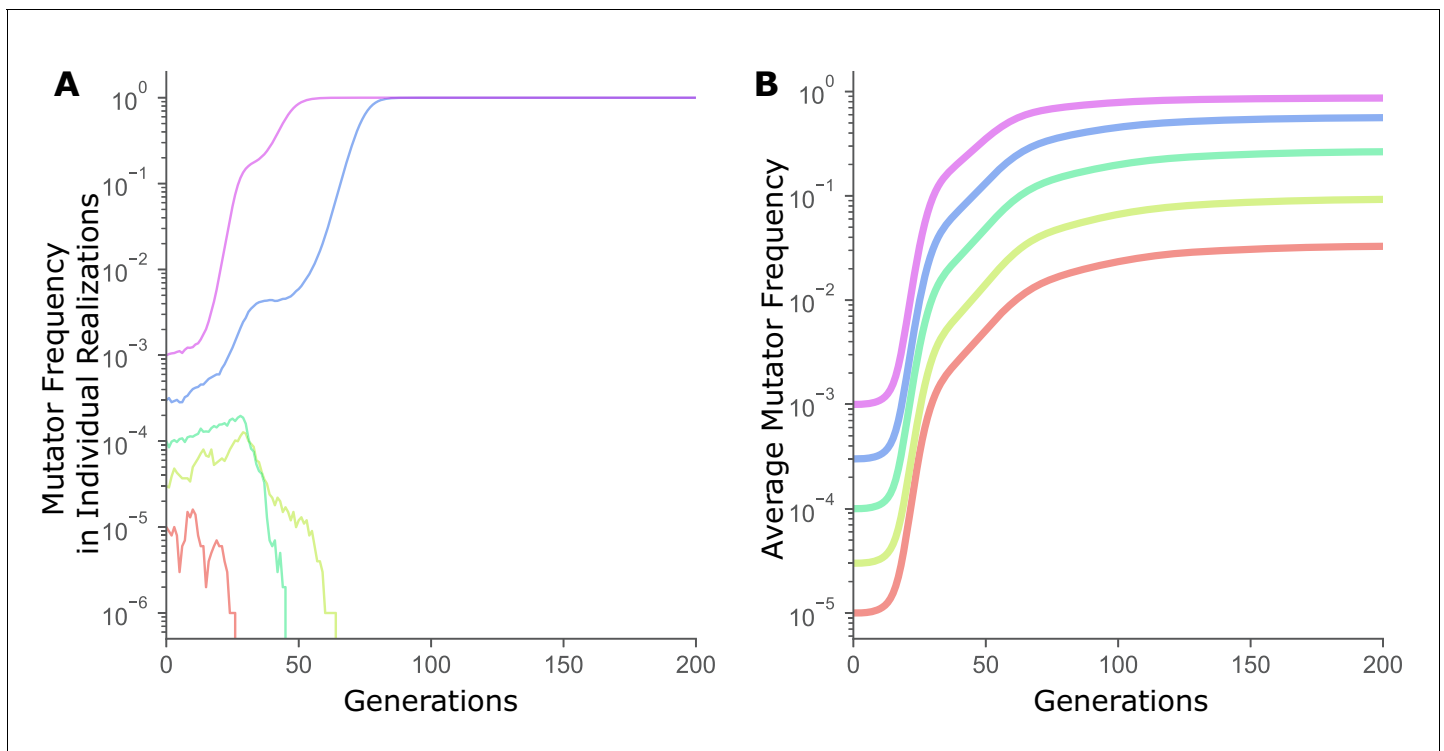

**Figure 1—figure supplement 1.** Simulations with exponentially distributed selection coefficients confirm that the frequency-dependent threshold in mutator dynamics is due to limited sampling. (A) Mutator trajectories in individual realizations. (B) Average mutator trajectories across realizations. Mutator frequencies averaged across  $10^5$  simulation runs. Parameter values as in **Figure 1** except  $N = 10^6$ , and beneficial and deleterious mutations are now randomly drawn from an exponential distribution with the mean  $s_{ben} = 0.1$  and  $s_{del} = -0.1$  respectively.

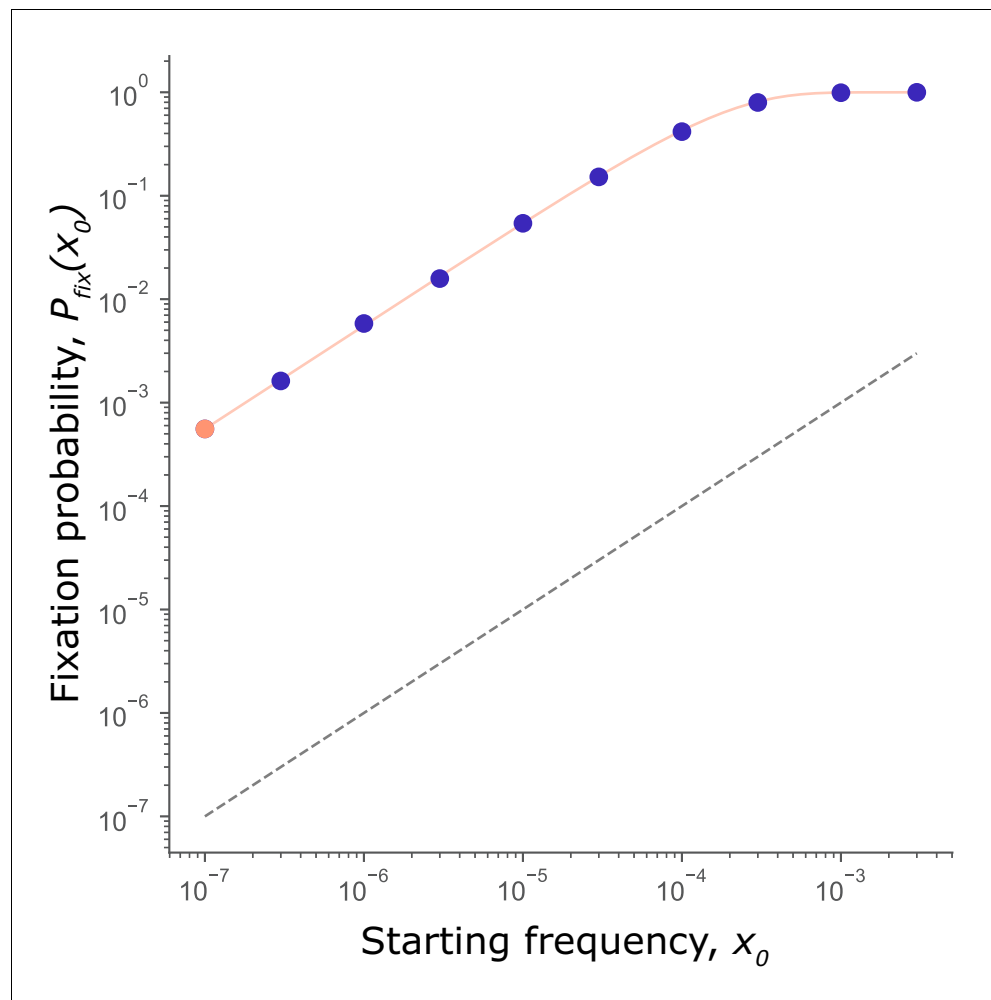

**Figure 2.** Mutator fixation probability is not frequency-dependent. Fixation probability,  $P_{fix}(x_0)$ , of a mutator initiated at frequency  $x_0$  (circles: orange for  $x_0 = 1/N$ , purple for  $x_0 > 1/N$ ). Data from simulations in **Figure 1**.  $P_{fix}(x_0)$  scales with but never crosses the fixation probability of a neutral mutation ( $x_0$ ; black dashed line). Thus, mutators are favored at all starting frequencies. The expected fixation probability  $P_{fix}(x_0)$  (solid orange line), calculated from the fixation probability of a single mutator,  $P_{fix}(x_0 = 1/N) = 5.6 \times 10^{-4}$  (orange point) using **Equation 1** is indistinguishable from the  $P_{fix}(x_0)$  observed in simulations, demonstrating that the per-capita fixation probability at every frequency is independent of  $x_0$  and equal to  $P_{fix}(x_0 = 1/N)$ .

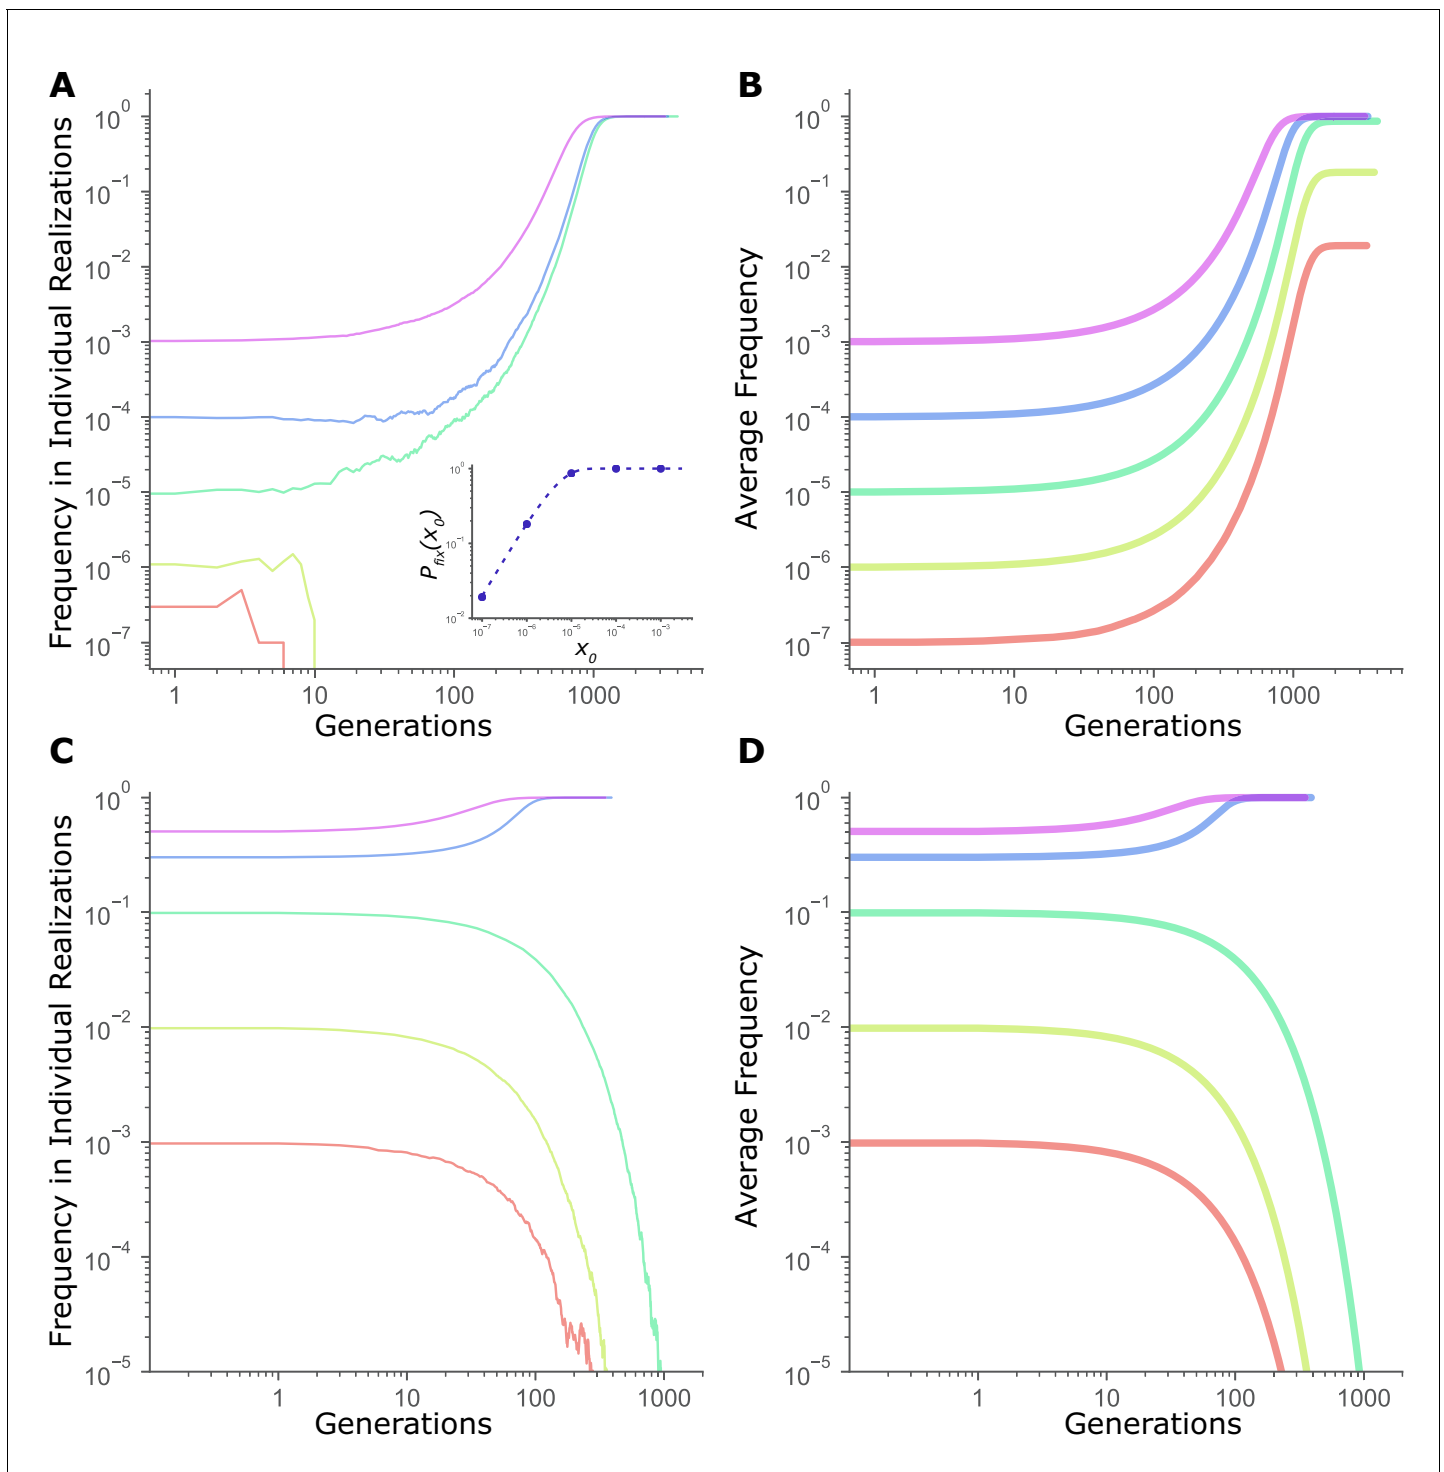

**Figure 3.** Frequency threshold in dynamics of fitness-affecting mutations. (A) Individual realizations of a simulation initiated with a directly beneficial mutation of size  $s_{ben} = 0.01$  at a starting frequency  $x_0$ . Population size,  $N = 10^7$ . Inset: Fixation probability of a beneficial mutation of size  $s_{ben} = 0.01$  at  $N = 10^7$ . Dashed line is given by  $P_{fix}^{ben}(x_0) = \frac{1 - e^{-2s_{ben}N_0}}{1 - e^{-2s_{ben}N}}$  (Kimura, 1962), while circles are values of  $P_{fix}^{ben}(x_0)$  measured in simulations (averaged across  $10^5$  runs). (B) Average frequency trajectories of a beneficial mutation of size  $s_{ben} = 0.01$  in (A) averaged across all  $10^5$  runs of simulation. (C) Individual realizations of a simulation initiated with a mutation under frequency dependent selection, with the selection coefficient  $s(x) = b + mx$ , where  $x$  is the frequency,  $b = -0.02$ , and  $m = 0.1$ , at  $N = 10^7$ . (D) Average frequency trajectories of the frequency-dependent mutation in (C) averaged across all  $10^5$  runs of simulation. All panels are on a log-log scale for clarity.
