# Supplementary figures and images for: Selection on mutators is not frequency-dependent
Source: eLife journal article supplement (doi:10.7554/elife.51177), 2019-11-07

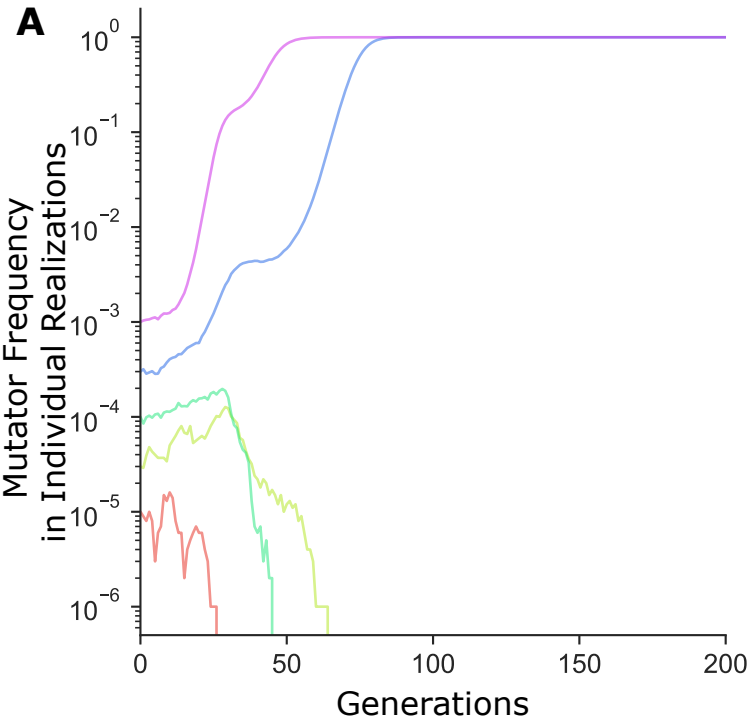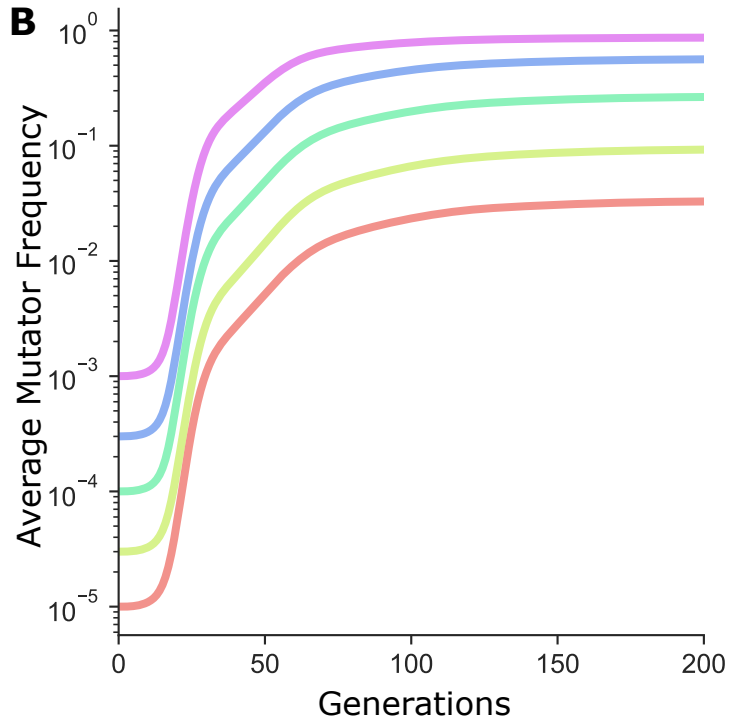

Supplement: supp [file elife-51177-supp-v1.zip]
